# Supplementary material for: Evolutionary changes in the Leishmania eIF4F complex involve variations in the eIF4E–eIF4G interactions
Source: PubMed Central journal article supplement — Nucleic Acids Res. 2009 Mar 24;37(10):3243–53. doi: 10.1093/nar/gkp190 (PMC2691829; doi:10.1093/nar/gkp190), 2009-03-24
Supplement: gkp190_1.pdf [file gkp190_1.pdf]

Yoffe et al 2009 - Evolutionary changes in the *Leishmania* eIF4F complex involve variations in the eIF4E-eIF4G interactions

SUPPLEMENTARY DATA

Supplementary Figure 1

A.

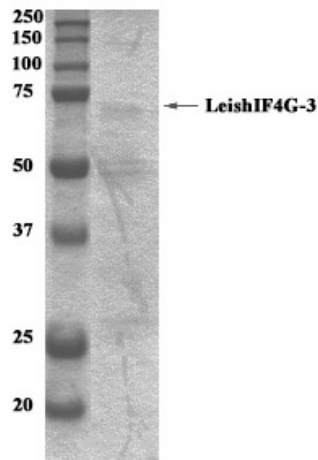

B. Protein = hypothetical protein, conserved [*Leishmania major*] |68125695|

```
1  MQFTVEQIRS VRNNYLEPPY PGFSLDEVVR RRRLTQTKLV RGENAWVAKG
51  TAQTTEEWVQ RLLHGTLNKL TEENKDIMID KLLTKELFAT EDIMNMVVNI
101 IFKKALDEPE NSKLYAGVCH SLALYEAKVL RDGHKGERPQ SQLRDAIIST
151 AQHEFR1TL2SK ELSKMEDKSE EELEYERSNV MRRKRSNMRF IGELYLCTAL
201 THSTMFTVMD LTMRCSDKTG FPSENI3ELL AALLNTIGDR LDKNHKKTLD
251 PYFTSLENFN KKSDCPYPPR IRFKIMDLLD LRKRGWGLKP KPVKAALPPS
301 HGKDKKYATA PPPKKGGRDQ GSAAAASKSW RDAATTKTGT AAAPAPSADK
351 GLNGRGTSSA APAANTAALS SSAASTAAAT APAGASFRDE ASPQVPLVKF
401 ELRVASMFQE WVADR4TNDVI LHWVDQFNTC DRFFESESEL CVAVAQEVIH
451 SACTTTRKDA QREAFSFLV5V GLYMIDTEVF DGFASALASA IEDGLEDV6P
501 KFGERFMSML RLTSTEQETR ADVYFDAANV LRLTYNRLES PDDSAVD7TLM
551 SFWDRVPLPS TDEENMIRMD LDVVYSLCNP EGVQDGLEKL LSRIIHSMLQ
601 MQLMDAEVLD EFLCLDVEDG LCAKVIADYK ERF8PK
```

| MS analysis | Peptide       | Coverage | score          |
|-------------|---------------|----------|----------------|
| #1          | MQFTVEQIRS    |          | 63             |
|             | GTAQTTEEWVQRL |          | 77             |
|             |               | 3.5%     |                |
| #2          | DAIISTAQHEFR  | 2%       | 96 (pep-miner) |

Accession number in LeishDB – LmjF16.6060

**Analysis of the 70 kDa protein eluted from m<sup>7</sup>GTP-Sepharose.** **A.** Coomassie staining of proteins that were eluted from a m<sup>7</sup>GTP-Sepharose column, following their concentration by TCA. The ~70 kDa band that was excised and analyzed by Mass spectrometry is marked by an arrow. **B.** The amino acid coverage of peptides identified in independent Mass Spectrometry analysis is given in different colors (blue and red).

## Supplementary Figure 2

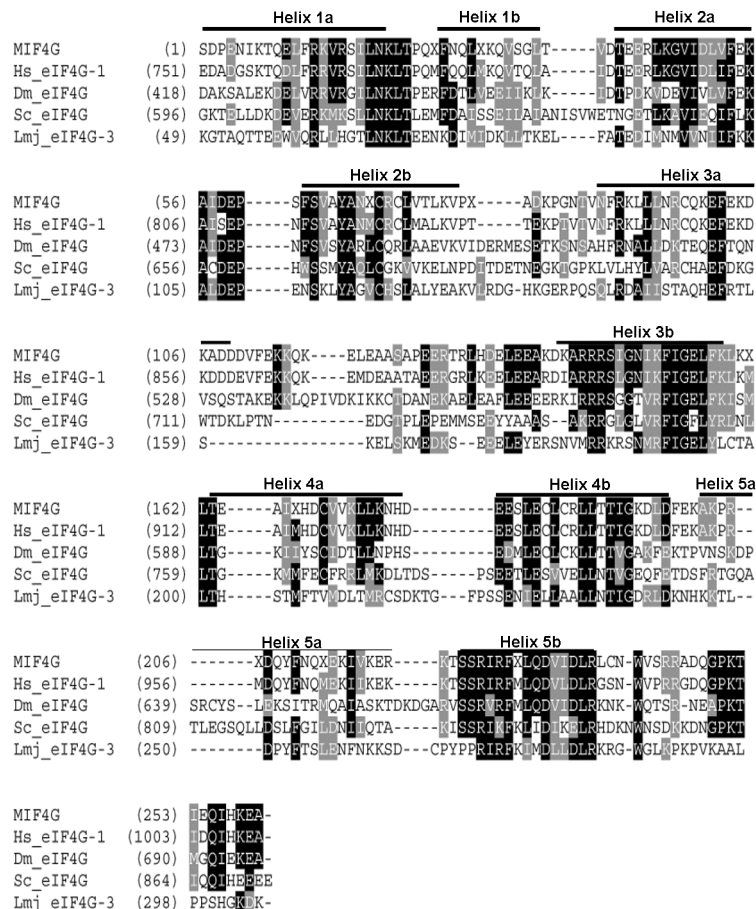

**Sequence alignment of MIF4G domains.** The amino acid sequences of MIF4G domains from different eIF4G proteins were subjected to multiple alignment using the Muscle algorithm. The predicted  $\alpha$ -helical secondary structure elements (1-5, a and b) are indicated above the sequences. Accession numbers are: MIF4G, gi:13399859; eIF4G-1 of Human (Hs), Q04637; *Drosophila melanogaster* (Dm), NP\_524640; *Saccharomyces cerevisiae* (Sc), Tif4631, NP\_011678; and *Leishmania major* (Lmj) LeishIF4G-3, LmjF16.1600. Identical and similar residues are highlighted in black and gray, respectively.

### Supplementary Figure 3

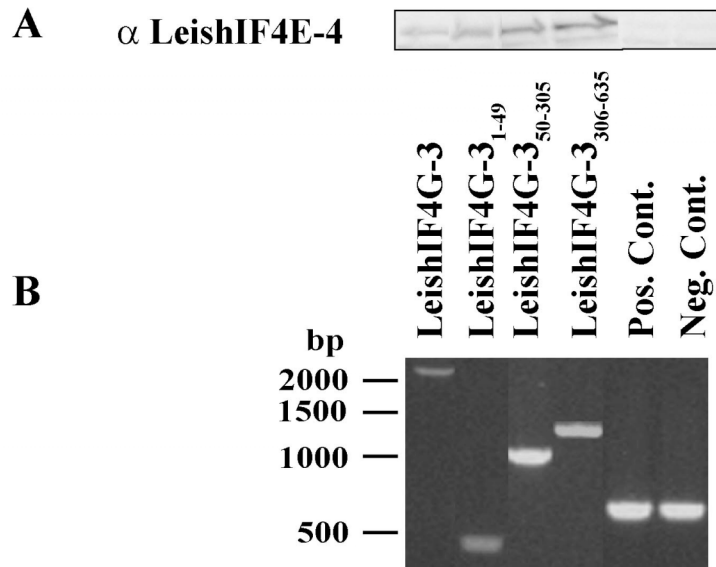

**Genes encoding for *Leishmania* proteins are present in the transgenic yeast cells.** The presence of the LeishIF4E-4 and LeishIF4G-3 was detected by Western analysis (**A**) or PCR (**B**), respectively.

## Supplementary Table 1

**Primers used for the cloning and site-directed mutagenesis.** Small letters represent addition of restriction sites.

|                                |                                                      |
|--------------------------------|------------------------------------------------------|
| Leish4G-3 FwBamHI              | cgggatccATGCAGTTCACCGTGGAGCA                         |
| Leish4G-3 RvStuI               | aaggcctTACTTGGGGAAGCGCTCCT                           |
| Leish4G-3 RvHindIII_NoStop     | cccaagcttCTTGGGGAAGCGCTCCT                           |
| Leish4G-3 RvXbaFLAG            | ctagtctagaCTATTTATCGTCATCGTCCTTGAGTCCTGGGGAAGCGCTCCT |
| Leish4G-3 147-129 StopRvEcoRI  | ceggaattcTACTTCGCAACCCAAGCATTc                       |
| Leish4G-3 148-166 FwBamHI      | cgggatccGGCACCGCTCAGACGAC                            |
| Leish4G-3 915- 898 StopRvEcoRI | ceggaattcTTATTTATCCTTGCCGTGGCT                       |
| Leish4G-3 916-934 FwBamHI      | cgggatccAAGTACGCCACTGCC                              |
| Leish4G-3 Δ23-29 Fw            | GAGCCGCCGTACCCGGGCGGACGCCGTCGCTTGAC                  |
| Leish4G-3 Δ23-29 Rv            | GTCAAGCGACGGCGTCGGCCCGGTACGGCGGCTC                   |
| Leish4G-3 Δ20-25 Fw            | TACCTTGAGCCGCCGGAAGTGGTGCGACGC                       |
| Leish4G-3 Δ20-25 Rv            | GCGTCGCACCACTTCCGGCGGCTCAAGGTA                       |
| Leish4G-3 Y20A Fw              | ACCTTGAGCCGCCGCCCCGGGCTTTTCTCT                       |
| Leish4G-3 Y20A Rv              | AGAGAAAAGCCCGGGGCCGGCGGCTCAAGGT                      |
| Leish4G-3 Y20F Fw              | ACCTTGAGCCGCCGTTCCCGGGCTTTTCTCT                      |
| Leish4G-3 Y20F Rv              | AGAGAAAAGCCCGGGAACGGCGGCTCAAGGT                      |
| Leish4G-3 P21A Fw              | TTGAGCCGCCGTACGCGGGCTTTTCTCTGGA                      |
| Leish4G-3 P21A Rv              | TCCAGAGAAAAGCCCGGTACGGCGGCTCAA                       |
| Leish4G-3 G22A Fw              | AGCCGCCGTACCCGGCCTTTTCTCTGGATGA                      |
| Leish4G-3 G22A Rv              | TCATCCAGAGAAAAGCCCGGTACGGCGGCT                       |
| Leish4G-3 F23A Fw              | CCGTACCCGGGCGCTTCTCTGGATGAAGTGG                      |
| Leish4G-3 F23A Rv              | CCACTTCATCCAGAGAAGCGCCCGGTACGG                       |
| Leish4G-3 S24A Fw              | CGTACCCGGGCTTTGCTCTGGATGAAGTGGT                      |
| Leish4G-3 S24A Rv              | ACCACTTCATCCAGAGCAAAGCCCGGTACG                       |
| Leish4G-3 L25A Fw              | ACCCGGGCTTTTCTGCGGATGAAGTGGTGCG                      |
| Leish4G-3 L25A Rv              | CGCACCCTTCATCCGCAGAAAAGCCCGGT                        |
| Leish4G-3 D26A Fw              | CGGGCTTTTCTCTGGCTGAAGTGGTGCGACG                      |
| Leish4G-3 D26A Rv              | CGTCGCACCACTTCAGCCAGAGAAAAGCCCG                      |
| Leish4G-3 E27A Fw              | GCTTTTCTCTGGATGCAGTGGTGCGACCCG                       |
| Leish4G-3 E27A Rv              | CGGCGTCGCACCACTGCATCCAGAGAAAAGC                      |
| Leish4G-3 V29F Fw              | CTCTGGATGAAGTGTTCGACCGTCGCTT                         |
| Leish4G-3 V29F Rv              | AAGCGACGGCGTCGAAACACTTCATCCAGAG                      |
| Leish4E-1 FwBamHI              | cgcggatccATGTCAGCCCCGTCTTCAGTT                       |
| Leish4E-1 RvXba_No STOP        | gctctagaAGACGCCTCGCCGTGCTT                           |
| Leish4E-4 FwBamHI              | cgcggatccATGAACCCCAACGCCACGGA                        |
| Leish4E-4 RvXba_No STOP        | gctctagaGTAGCGCCGACGGTTCTT                           |
| Leish4E-4 FwEcoRI              | ggaattcATGAACCCCAACGCCACGGA                          |
| Leish4E-4 RvSalI               | acgcgtgacTTAGTAGCGCCGACGGTTCTT                       |
| pAD 5'                         | Agggatgttaataaccactac                                |
| pAD 3'                         | Gcacagttgaagtgaactgc                                 |
